# Supplementary material for: The influence of composition on the physical properties of PLA-PEG-PLA-co-Boltorn based polyester hydrogels and their biological performance
Source: Royal Society of Chemistry journal article supplement (doi:10.1039/c2jm00039c), 2012-01-01
Supplement: c2jm00039c.pdf [file c2jm00039c.pdf]

## Supporting Information

### The influence of composition on the physical properties of PLA-PEG-PLA-co-Boltorn based polyester hydrogels and their biological performances

David K. Wang,<sup>a,b</sup> Srinivas Varanasi,<sup>c</sup> David J.T. Hill,<sup>d</sup> Firas Rasoul,<sup>\*a,b</sup> Anne L. Symons,<sup>c</sup> and Andrew K. Whittaker<sup>a,b</sup>

<sup>a</sup>Australian Institute for Bioengineering and Nanotechnology, University of Queensland, Brisbane Qld 4072, Australia.

<sup>\*</sup>[f.rasoul@uq.edu.au](mailto:f.rasoul@uq.edu.au); [d.wang1@uq.edu.au](mailto:d.wang1@uq.edu.au) and [a.whittaker@uq.edu.au](mailto:a.whittaker@uq.edu.au)

<sup>b</sup>Centre for Advanced Imaging, University of Queensland, Brisbane Qld 4072, Australia.

<sup>c</sup>School of Dentistry, The University of Queensland, Brisbane, Queensland,

Australia. [srinivas.varanasi@uqconnect.edu.au](mailto:srinivas.varanasi@uqconnect.edu.au), [a.symons@uq.edu.au](mailto:a.symons@uq.edu.au)

<sup>d</sup>School of Chemistry and Molecular Biosciences, University of Queensland, Brisbane Qld 4072, Australia. [d.hill@uq.edu.au](mailto:d.hill@uq.edu.au)

#### A typical synthesis of PLA<sub>5</sub>PEG<sub>20</sub>PLA<sub>5</sub> copolymer (1kL<sub>5</sub>)

All reactants were dried overnight in a freeze-dryer to remove traces of solvent or moisture. In a two-neck round bottom flask equipped with magnetic stirrer, the dihydroxyl 1kPEG (10.0 g, 10.0 mmol) was dissolved in 100 mL of CH<sub>2</sub>Cl<sub>2</sub> under Ar atmosphere followed by the addition of D,L-lactic acid (7.20 g, 50.0 mmol). After the complete dissolution of the PEG and D,L-lactic acid, 1 wt % of DBU (0.17 g, 1.13 mmol), diluted 100 fold using dry CH<sub>2</sub>Cl<sub>2</sub>, was added via a pressure-equalizing dropping funnel. The DBU solution was slowly added over 30 min and the reaction was further stirred for 4 h at room temperature under the argon atmosphere. Once the reaction was completed, the polymer solution was precipitated into an excess of diethyl ether, leading to a white, sticky product. A total of 15.8 g (9.19 mmol) of triblock copolymer was collected (91.9% yield) and dried under vacuum at 40 °C. ATR-FTIR (neat, cm<sup>-1</sup>): 3550-3230 (O-H str), 3000-2850 (C-H str), 1754 (C=O str), 1382 (C-H sym def), 1100 (C-O-C asym str). <sup>1</sup>H NMR (d-CHCl<sub>3</sub>, 500 MHz): δ 1.40-1.56 (m, CH<sub>3</sub>CH, 30H), 3.55-3.68 (m, OCH<sub>2</sub>CH<sub>2</sub>O, 92H), 4.20-4.35 (m, CH<sub>2</sub>CH<sub>2</sub>O.COCHCH<sub>3</sub>, 6H), 5.08-5.20 (m, COCHCH<sub>3</sub>O.CO, 8H).

#### A typical synthesis of PLA<sub>5</sub>PEG<sub>20</sub>PLA<sub>5</sub> diacrylate (1kL<sub>5</sub>DA)

To a solution of PLA<sub>5</sub>PEG<sub>20</sub>PLA<sub>5</sub> copolymer (15 g, 8.72 mmol) in 100 mL of dry CH<sub>2</sub>Cl<sub>2</sub> in a two-neck round bottom flask at 0 °C, NEt<sub>3</sub> (2.45 g, 26.16 mmol) was added. ACC (3.16 g,

34.88 mmol) dissolved in 10 mL of dry  $\text{CH}_2\text{Cl}_2$  was then slowly added to the polymer mixture over 1 h using a pressure-equalizing funnel and the solution stirred for a further 4 h at 0 °C under an argon atmosphere. The reaction mixture was then stirred at room temperature for another 36 h. 200 mL  $\text{CH}_2\text{Cl}_2$  was added to the mixture and it was then washed with 1M HCl (3 x 40 mL), followed by saturated  $\text{NaHCO}_3$  (aq) (3 x 40 mL), and brine (3 x 40 mL). The organic layer was then collected and partially dried under reduced pressure and then precipitated in an excess of diethyl ether. The product (12.59 g, 6.89 mmol, 79.0% yield) was dried under vacuum at 40 °C. ATR-FTIR (neat,  $\text{cm}^{-1}$ ): 3000-2850 (C-H str), 1754 (C=O str), 1727 (C=O str), 1640-1620 (C=C str), 1410 (C-H def), 1382 (C-H sym def), 1100 (C-O-C asym str), 810 ( $\text{CH}_2$  vinyl def).  $^1\text{H}$  NMR ( $d\text{-CHCl}_3$ , 500 MHz):  $\delta$  1.40-1.56 (m,  $\text{CH}_3\text{CH}$ , 29H), 3.55-3.68 (m,  $\text{OCH}_2\text{CH}_2\text{O}$ , 92H), 4.20-4.35 (m,  $\text{CH}_2\text{CH}_2\text{O.COCHCH}_3$ , 4H), 5.08-5.20 (m,  $\text{COCHCH}_3\text{O.CO}$ , 9H), 5.85-5.88 (dd,  $J' = 10.31$ ,  $J'' = 1.40$  Hz, cis  $\text{CH}_c=\text{CH}_a\text{H}_b$ , 2H), 6.12-6.19 (td,  $J' = 17.33$ ,  $J'' = 10.31$  Hz,  $\text{CH}_c=\text{CH}_a\text{H}_b$ , 2H), 6.40-6.44 (dd,  $J' = 17.33$ ,  $J'' = 1.40$  Hz, trans  $\text{CH}_c=\text{CH}_a\text{H}_b$ , 2H).

### $^1\text{H}$ NMR spectra of the polymers

$^1\text{H}$  NMR spectra were used to characterize and confirm the purity of the  $\approx 1$  k PEG starting polymer and the two reaction products synthesized as described above.

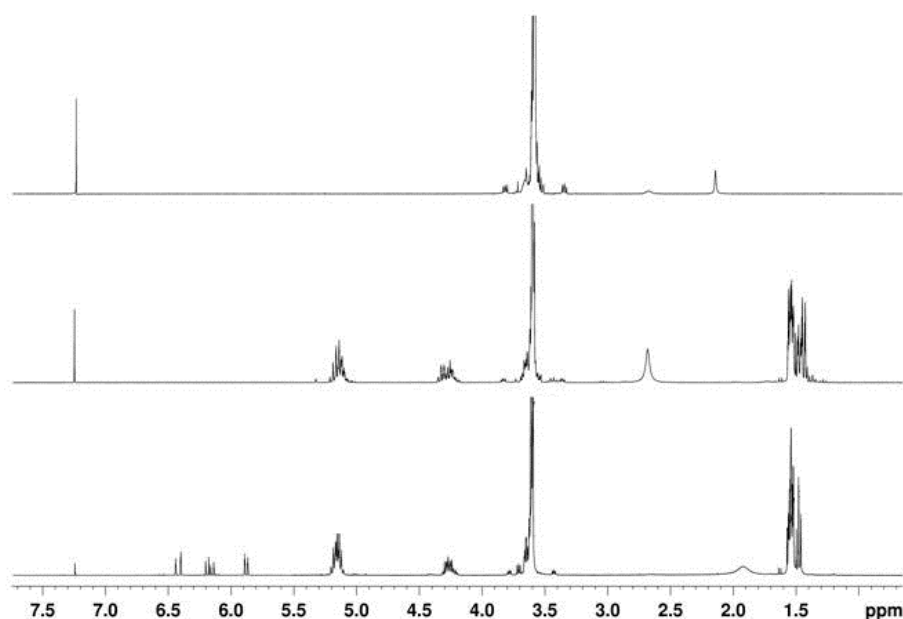

S1.  $^1\text{H}$  NMR spectra of  $\approx 1\text{kPEG}$  (top),  $1\text{kL}_5$  (middle) and  $1\text{kL}_5\text{DA}$  (bottom) in  $\text{CDCl}_3$

### **Flame atomic absorption spectrophotometry (AAS)**

A Varian SpectrAA 220FS flame atomic absorption spectrophotometer, AAS, was used in conjunction with a copper hollow cathode lamp operated at 4 mA and an air-acetylene flame. The nebulizer free uptake rate was 5 ml min<sup>-1</sup> and the wavelength was set to 324.8 nm with a spectral slit width of 0.5 nm. A computer with SpectrAA software was connected to the spectrophotometer for data handling.

Ten standard samples of Cu(II) in ultrapure MilliQ Millipore water at a concentration ranging from 0 to 10 ppm were prepared from cupric nitrate standards. The absorbances were measured and a linear calibration curve was plotted and used for the determination of Cu content. For analysis of the crosslinked, insoluble BH20PEGA/PLA<sub>a</sub>PEG<sub>b</sub>PLA<sub>a</sub>DA copolymers, the polymers were first digested in 10 mL of 30% nitric acid at 90 °C for 3 h, and then before analysis the solutions were diluted by mixing 1 part of the digested polymer solution with 9 parts of MilliQ Millipore water.
